# Supplementary material
Source: MDPI journal article supplement (https://www.mdpi.com/2071-1050/15/17/13277)
Supplement: s1 [file s1]

**Table S1.** Land use table for Yanchi County

| Type of land use                           | Area/ha |
|--------------------------------------------|---------|
| Cropland                                   | 109,722 |
| Garden land                                | 1,658   |
| Woodland                                   | 137,945 |
| Grassland                                  | 322,650 |
| Urban, village, industrial and mining land | 19,380  |
| Transport                                  | 9,536   |
| Waters and water facilities                | 4,351   |

**Table S2.** Meteorological data for Yanchi County

| Indicator                | Indicator volume |
|--------------------------|------------------|
| Average temperature (°C) | 10.2             |
| Maximum temperature (°C) | 37.4             |
| Lowest temperature (°C)  | - 27.1           |
| Precipitation (mm)       | 227.9            |

**Table S3.** ALOS-2 satellite acquisition date information

| Imaging date             | Main image | Auxiliary images |
|--------------------------|------------|------------------|
| Waveband                 | 20180707   | 20190706         |
| Satellite flight azimuth | HH         | HH               |
| Angle of incidence       | -10.73     | -10.73           |
| Imaging date             | 31.41      | 31.41            |

**Table S4.** GNSS monitoring points information

| Point No | Latitude  | Longitude  | Point No | Latitude  | Longitude  |
|----------|-----------|------------|----------|-----------|------------|
| JF-2-1   | 37°39'30" | 106°51'33" | JF-2-11  | 37°38'36" | 106°52'13" |
| JF-2-2   | 37°39'16" | 106°51'40" | JF-2-12  | 37°38'52" | 106°52'18" |
| JF-2-3   | 37°38'59" | 106°51'44" | JF-2-13  | 37°38'54" | 106°52'04" |
| JF-2-4   | 37°38'42" | 106°51'49" | JF-2-14  | 37°39'02" | 106°52'14" |

|         |           |            |         |           |            |
|---------|-----------|------------|---------|-----------|------------|
| JF-2-5  | 37°38'27" | 106°51'52" | JF-2-15 | 37°39'14" | 106°52'11" |
| JF-2-6  | 37°38'10" | 106°51'53" | JF-2-16 | 37°39'21" | 106°52'02" |
| JF-2-7  | 37°37'29" | 106°51'26" | JF-2-17 | 37°39'31" | 106°52'05" |
| JF-2-8  | 37°37'18" | 106°51'25" | JF-2-18 | 37°39'35" | 106°51'54" |
| JF-2-9  | 37°37'07" | 106°51'28" | JF-2-19 | 37°39'41" | 106°52'04" |
| JF-2-10 | 37°36'58" | 106°51'27" | JF-2-20 | 37°39'53" | 106°52'03" |

**Table S5.** Known point information for simulated experiments

| Number | Longitude /° | Latitude /° | Phase Value |
|--------|--------------|-------------|-------------|
| 1      | 106.86       | 37.64       | 50.56404    |
| 2      | 106.87       | 37.64       | 50.34814    |
| 3      | 106.88       | 37.64       | 50.42162    |
| 4      | 106.86       | 37.65       | 49.94814    |
| 5      | 106.87       | 37.65       | 50.02163    |
| 6      | 106.88       | 37.65       | 50.49302    |
| 7      | 106.86       | 37.66       | 49.87484    |
| 8      | 106.87       | 37.66       | 49.91217    |
| 9      | 106.88       | 37.66       | 50.27504    |
| 10     | 106.86       | 37.67       | 49.40364    |
| 11     | 106.87       | 37.67       | 49.65801    |
| 12     | 106.88       | 37.67       | 49.40598    |

**Table S6.** Simulation experiment sampling point information table

| Number | Longitude /° | Latitude /° | Fitted phase /mm | Unwrapped Phase /mm | Error /mm |
|--------|--------------|-------------|------------------|---------------------|-----------|
| 1      | 106.862      | 37.653      | 49.81618         | 49.81666            | -0.00048  |
| 2      | 106.875      | 37.655      | 50.16642         | 50.1669             | -0.00048  |
| 3      | 106.866      | 37.666      | 49.32303         | 49.32352            | -0.00049  |
| 4      | 106.874      | 37.665      | 49.71336         | 49.71384            | -0.00048  |
| 5      | 106.861      | 37.654      | 49.9488          | 49.94928            | -0.00048  |

|    |         |        |          |          |          |
|----|---------|--------|----------|----------|----------|
| 6  | 106.873 | 37.657 | 49.9999  | 50.00038 | -0.00048 |
| 7  | 106.866 | 37.667 | 49.62016 | 49.62065 | -0.00049 |
| 8  | 106.872 | 37.668 | 49.66496 | 49.66544 | -0.00048 |
| 9  | 106.863 | 37.657 | 49.88232 | 49.8828  | -0.00048 |
| 10 | 106.874 | 37.652 | 50.09884 | 50.09932 | -0.00048 |
| 11 | 106.865 | 37.663 | 49.75967 | 49.76015 | -0.00048 |
| 12 | 106.876 | 37.664 | 49.9188  | 49.91928 | -0.00048 |

**Table S7.** Sample point information

| Number | Longitude /° | Latitude /° | Fitted phase /mm | Unwrapped Phase /mm | Error /mm |
|--------|--------------|-------------|------------------|---------------------|-----------|
| 1      | 106.862      | 37.653      | -119.026         | -77.8358            | -41.1907  |
| 2      | 106.866      | 37.666      | -19.3679         | -35.4917            | 16.12381  |
| 3      | 106.874      | 37.665      | -165.122         | -152.315            | -12.807   |
| 4      | 106.861      | 37.654      | -49.1421         | -77.3862            | 28.24407  |
| 5      | 106.873      | 37.657      | -920.974         | -981.592            | 60.61738  |
| 6      | 106.866      | 37.667      | -1.96721         | -34.7957            | 32.82853  |
| 7      | 106.872      | 37.668      | -82.5051         | -39.719             | -42.7861  |
| 8      | 106.863      | 37.657      | -534.838         | -588.95             | 54.11148  |
| 9      | 106.874      | 37.652      | -1209.42         | -1336.15            | 126.7298  |
| 10     | 106.865      | 37.663      | -152.529         | -157.946            | 5.416622  |
| 11     | 106.872      | 37.664      | -28.3215         | -29.4553            | 1.133837  |

**Table S8.** Improved sample point information

| Number | Longitude /° | Latitude /° | Fitted phase /mm | Unwrapped Phase /mm | Error /mm |
|--------|--------------|-------------|------------------|---------------------|-----------|
| 1      | 106.862      | 37.653      | -119.026         | -68.8735            | -50.153   |
| 2      | 106.866      | 37.666      | -19.3679         | -35.4917            | 16.12381  |
| 3      | 106.874      | 37.665      | -165.122         | -142.848            | -22.274   |
| 4      | 106.861      | 37.654      | -49.1421         | -72.0183            | 22.87617  |
| 5      | 106.873      | 37.657      | -920.974         | -952.386            | 31.41147  |
| 6      | 106.866      | 37.667      | -1.96721         | -35.0764            | 33.10919  |

|    |         |        |          |          |          |
|----|---------|--------|----------|----------|----------|
| 7  | 106.872 | 37.668 | -82.5051 | -39.4574 | -43.0477 |
| 8  | 106.863 | 37.657 | -534.838 | -568.348 | 33.50985 |
| 9  | 106.874 | 37.652 | -1209.42 | -1219.47 | 10.04984 |
| 10 | 106.865 | 37.663 | -152.529 | -137.648 | -14.8812 |
| 11 | 106.872 | 37.664 | -28.3215 | -29.4553 | 1.133837 |

---
